# Supplementary material for: Use of carbosilane dendrimer to switch macrophage polarization for the acquisition of antitumor functions
Source: Royal Society of Chemistry journal article supplement (doi:10.1039/c4nr04038d), 2014-09-05
Supplement: c4nr04038d2.pdf [file c4nr04038d2.pdf]

**Figure S1.- Schematic representation of dendrimer structure.** 1G-03NN12 (A), 2G-03NN24 (B) and 3G-03NN48 carbosilane dendrimers.

**Figure S2. Associations between proteins in dendrimer-treated macrophages.** An evidence view of kinases and associated proteins in 2G-03NN24-treated M2 is shown. Different bars represent evidences for the association based on experiments (black bars) or on databases (grey bars). The score value was calculated based on databases and experimental data with String software (<http://string-db.org>).

**Table S1.- Protein phosphorylation in macrophages.** Two duplicates (Dup.) were quantified for each protein. The phosphorylated residue analyzed is indicated in brackets (when there are various residues analyzed for each protein). F555: fluorescence of treated macrophages, F632: fluorescence of untreated cells, B555: background fluorescence at 555 nm, B632: background fluorescence at 632 nm. Fold change was calculated as  $((F555-B555)/(F632-B632))$ . Average was calculated as duplicates average of  $\text{Log}_2(555/632)$ . Data analyzed with Gene Pix Pro7 software.
